# Supplementary material
Source: PubMed Central journal article supplement (PMC5880523)
Supplement: AnnalsATS.201709-723OC_forno_data_supplement.pdf [file AnnalsATS.201709-723OC_forno_data_supplement.pdf]

## Online Data Supplement

### **Adiposity and asthma in a nationwide study of children and adults in the United States**

Erick Forno\*<sup>1</sup>, Yueh-Ying Han\*<sup>1</sup>, Ingrid M. Libman<sup>2</sup>, Radhika H. Muzumdar<sup>2</sup>, Juan C. Celedón<sup>1</sup>

<sup>1</sup>Division of Pediatric Pulmonary Medicine, Allergy, and Immunology, and <sup>2</sup>Division of Pediatric Endocrinology, Children's Hospital of Pittsburgh of UPMC, University of Pittsburgh, Pittsburgh, PA. \*These authors contributed equally to the study.

**Corresponding author:** Erick Forno, M.D., M.P.H.

Division of Pediatric Pulmonary Medicine, Allergy and Immunology  
Children's Hospital of Pittsburgh of UPMC  
4401 Penn Avenue, Pittsburgh, PA 15224  
Phone: 412.692.8429; Fax: 412.692.7636  
Email: [erick.forno@chp.edu](mailto:erick.forno@chp.edu)

**Author Contributions:** Study conception and design: EF, YYH, and JCC. Data interpretation: all authors. Data analysis and first draft of manuscript: EF, YYH and JCC. Manuscript revision for important intellectual content: all authors. Approved the final version for submission: all authors.

**Sources of Funding:** Dr. Forno's contribution was supported by grants HL125666 from the U.S. National Institutes of Health (NIH), Children's Hospital of Pittsburgh, and the Klosterfrau Foundation. Dr. Celedón's contribution was supported by grants HL079966, HL117191 and HL119952 from the U.S. NIH, and by The Heinz Endowments. Dr. Forno and Dr. Han had full access to all of the data, and takes responsibility for the integrity and accuracy of the analysis. None of the funding sponsors had any role in study design, data analysis, or manuscript preparation or approval.

**Supplemental Figure E1 – Flow diagram of NHANES participants included in the analysis**

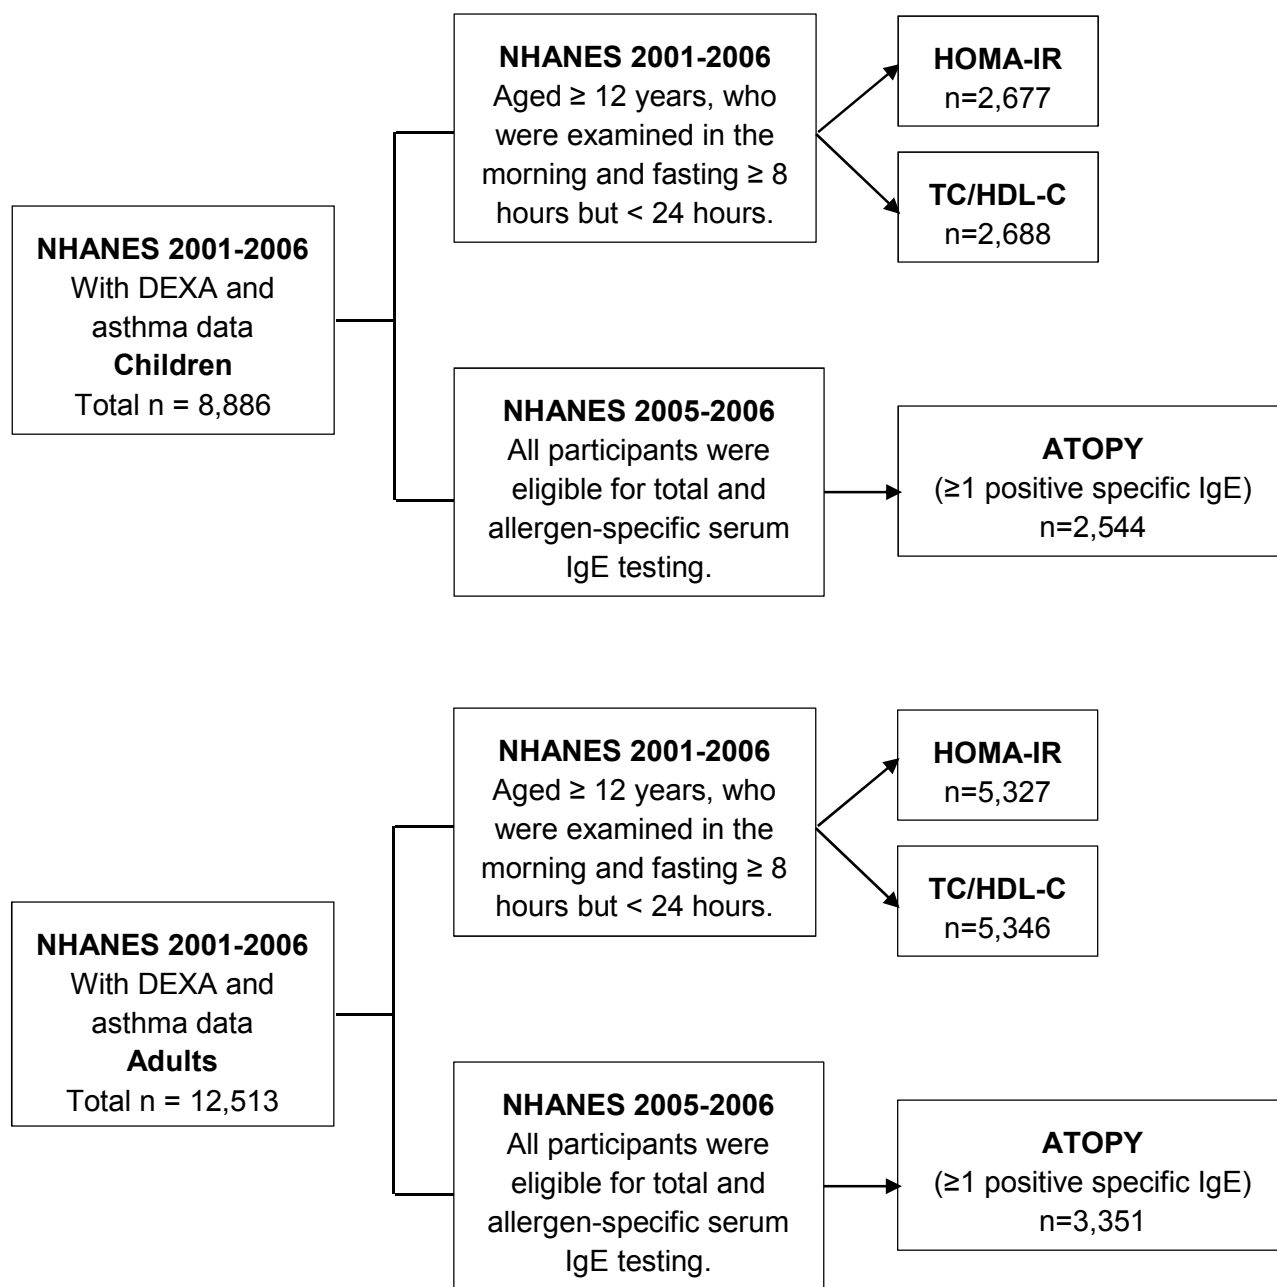

**Supplemental Table E1 – Adiposity measures and current asthma in children and adults by gender after adjusting for insulin resistance and dyslipidemia**

|                                          | Children (12-19 years, n=2,903)       |                        | Adults (20-69 years, n=5,776)        |                                      |
|------------------------------------------|---------------------------------------|------------------------|--------------------------------------|--------------------------------------|
|                                          | Male<br>Asthma n=169                  | Female<br>Asthma n=155 | Male<br>Asthma n=167                 | Female<br>Asthma n=237               |
|                                          | Odds Ratio (95% confidence interval)  |                        |                                      |                                      |
| <b>Anthropometry</b>                     |                                       |                        |                                      |                                      |
| BMI <sup>1</sup>                         | 1.12 (0.86, 1.48)                     | 1.22 (0.94, 1.58)      | <b>1.06 (1.03, 1.09)<sup>‡</sup></b> | <b>1.03 (1.01, 1.06)<sup>‡</sup></b> |
| Obese <sup>3</sup>                       | <b>2.16 (1.23, 3.81)<sup>‡</sup></b>  | 1.06 (0.46, 2.44)      | <b>2.12 (1.29, 3.49)<sup>‡</sup></b> | <b>1.96 (1.22, 3.15)<sup>‡</sup></b> |
| Waist circumference <sup>1</sup>         | <b>1.36 (1.08, 1.71)<sup>‡</sup></b>  | 1.05 (0.81, 1.36)      | <b>1.03 (1.01, 1.04)<sup>‡</sup></b> | <b>1.02 (1.01, 1.03)<sup>‡</sup></b> |
| Central obese <sup>4</sup>               | <b>5.16 (2.56, 10.44)<sup>‡</sup></b> | 1.14 (0.32, 4.14)      | 1.25 (0.79, 1.98)                    | 1.46 (0.99, 2.15)                    |
| Waist-to-height ratio <sup>2</sup>       | <b>1.45 (1.13, 1.87)<sup>‡</sup></b>  | 0.97 (0.74, 1.27)      | <b>1.53 (1.26, 1.86)<sup>‡</sup></b> | <b>1.32 (1.09, 1.59)<sup>‡</sup></b> |
| Percent body fat <sup>1</sup>            | 1.23 (0.79, 1.93)                     | 0.92 (0.69, 1.23)      | 1.02 (0.98, 1.06)                    | 1.02 (0.99, 1.04)                    |
| <b>Dural-Energy X-ray Absorptiometry</b> |                                       |                        |                                      |                                      |
| Total percent fat                        | <b>1.04 (1.01, 1.08)<sup>†</sup></b>  | 0.99 (0.94, 1.04)      | <b>1.05 (1.02, 1.09)<sup>‡</sup></b> | <b>1.04 (1.02, 1.07)<sup>‡</sup></b> |
| Trunk percent fat                        | <b>1.04 (1.01, 1.07)<sup>†</sup></b>  | 0.99 (0.95, 1.03)      | <b>1.04 (1.01, 1.08)<sup>†</sup></b> | <b>1.03 (1.01, 1.05)<sup>‡</sup></b> |
| Leg percent fat                          | 1.03 (1.00, 1.06)                     | 1.00 (0.95, 1.05)      | <b>1.05 (1.01, 1.08)<sup>‡</sup></b> | <b>1.03 (1.00, 1.06)<sup>‡</sup></b> |
| Fat Mass Index                           | <b>1.12 (1.04, 1.20)<sup>‡</sup></b>  | 1.00 (0.92, 1.09)      | <b>1.10 (1.05, 1.16)<sup>‡</sup></b> | <b>1.05 (1.02, 1.09)<sup>‡</sup></b> |
| Trunk-to-total fat <sup>2</sup>          | 1.26 (0.85, 1.87)                     | 0.88 (0.64, 1.22)      | 1.17 (0.92, 1.50)                    | 1.18 (0.95, 1.46)                    |
| Legs-to-total fat <sup>2</sup>           | 0.95 (0.71, 1.28)                     | 1.24 (0.93, 1.67)      | 1.01 (0.77, 1.32)                    | 0.89 (0.71, 1.12)                    |
| Trunk-to-legs fat <sup>2</sup>           | 1.18 (0.80, 1.73)                     | 0.82 (0.60, 1.12)      | 1.03 (0.83, 1.27)                    | 1.13 (0.90, 1.40)                    |

All models adjusted for age, race, annual household income, serum cotinine, serum CRP, HOMA-IR, and TC/HDL-C. When adding HOMA-IR and/or TC/HDL-C, results for males remained significant (children and adults). Results for girls became all non-significant. Results for adult females remained significant for general adiposity, but all local adiposity ratios (Tr/Tot, L/Tot, Tr/L) became non-significant.

†P<0.05, ‡P<0.01.

<sup>1</sup>Z-score for children only (BMI, WC, PBF).

<sup>2</sup>Z-score for children and adults, calculated separately for each age group (WHtR, Tr/Tot, L/Tot, Tr/L).

<sup>3</sup>Compared to normal weight.

<sup>4</sup>Compared to non-central obese.

## Supplemental Table E2 – Adiposity measures and atopic asthma in adults by gender

|                                         | Atopic adult male<br>(Asthma n=78)             | Atopic adult female<br>(Asthma n=92) |
|-----------------------------------------|------------------------------------------------|--------------------------------------|
|                                         | Odds Ratio (95% confidence interval) of asthma |                                      |
| <b>Anthropometry</b>                    |                                                |                                      |
| BMI                                     | <b>1.06 (1.01, 1.11)<sup>†</sup></b>           | <b>1.06 (1.02, 1.10)<sup>‡</sup></b> |
| Obese <sup>2</sup>                      | 2.05 (0.99, 4.26)                              | <b>2.40 (1.36, 4.26)<sup>‡</sup></b> |
| Waist circumference                     | 1.02 (0.99, 1.04)                              | <b>1.03 (1.01, 1.04)<sup>‡</sup></b> |
| Central obese <sup>3</sup>              | 1.35 (0.68, 2.68)                              | 1.59 (0.85, 2.96)                    |
| Waist-to-height ratio <sup>1</sup>      | <b>1.47 (1.11, 1.94)<sup>‡</sup></b>           | <b>1.57 (1.21, 2.04)<sup>‡</sup></b> |
| Percent body fat                        | 0.97 (0.93, 1.02)                              | 1.01 (0.97, 1.04)                    |
| <b>Dual-Energy X-ray Absorptiometry</b> |                                                |                                      |
| Total percent fat                       | 1.02 (0.98, 1.07)                              | <b>1.06 (1.02, 1.11)<sup>‡</sup></b> |
| Trunk percent fat                       | 1.02 (0.98, 1.05)                              | <b>1.05 (1.01, 1.09)<sup>‡</sup></b> |
| Leg percent fat                         | 1.03 (0.98, 1.08)                              | 1.03 (0.99, 1.07)                    |
| Fat Mass Index                          | 1.07 (0.99, 1.17)                              | <b>1.09 (1.03, 1.15)<sup>‡</sup></b> |
| Trunk-to-total fat <sup>1</sup>         | 0.97 (0.70, 1.34)                              | <b>1.42 (1.08, 1.87)<sup>‡</sup></b> |
| Legs-to-total fat <sup>1</sup>          | 1.14 (0.76, 1.70)                              | <b>0.70 (0.54, 0.92)<sup>‡</sup></b> |
| Trunk-to-legs fat <sup>1</sup>          | 0.97 (0.70, 1.34)                              | <b>1.42 (1.08, 1.87)<sup>†</sup></b> |

All models adjusted for age, race, annual household income, serum cotinine, and serum CRP.

<sup>†</sup>P<0.05, <sup>‡</sup>P<0.01.

<sup>1</sup>Z-scores.

<sup>2</sup>Compared to normal weight.

<sup>3</sup>Compared to non-central obese.
